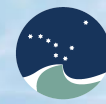

## Seasonal variation in the egg morphology of the copepod *Eurytemora americana* and its relationship with reproductive strategy in a temperate estuary in Argentina

Anabela A. Berasategui\*, Mónica S. Hoffmeyer, M. Sofía Dutto, and Florencia Biancalana

Instituto Argentino de Oceanografía, Centro Científico y Tecnológico CONICET Bahía Blanca, Camino la Carrindanga km 7.5, Bahía Blanca, Buenos Aires B8000FWB, Argentina

\*Corresponding Author: tel/fax: +54 291 4861112/1519; e-mail: [aberasa@criba.edu.ar](mailto:aberasa@criba.edu.ar)

Berasategui, A. A., Hoffmeyer, M. S., Dutto, M. S., and Biancalana, F. 2012. Seasonal variation in the egg morphology of the copepod *Eurytemora americana* and its relationship with reproductive strategy in a temperate estuary in Argentina. – ICES Journal of Marine Science, 69: 380–388.

Received 1 April 2011; accepted 14 November 2011; advance access publication 2 January 2012.

Seasonal variation in the morphology of *Eurytemora americana* eggs and its relationship with reproductive strategy were studied in the Bahía Blanca Estuary. Eggs from field females were analysed morphologically by optical (OM) and electron microscopy [scanning electron microscopy (SEM)–transmission electron microscopy (TEM)] during the population pulse. Additionally, egg-carrying females were incubated simulating *in situ* environmental conditions to evaluate the resting egg character. Subitaneous and resting eggs were indistinguishable by OM, but showed different chorion appearance under SEM and TEM. Sinuous patterned chorion eggs, mainly produced during the period of population growth, were classed as subitaneous eggs based on their high level of hatching success. Eggs with a sponge-like appearance, produced after the population peaked, were classed as diapause eggs based on their inability to hatch even under favourable conditions. There were significant differences in egg size through the population pulse and diapause eggs were significantly bigger than subitaneous eggs. The observation of both morphotypes in egg-carrying females after peak population abundance confirms the existence of a transitional reproductive stage before the exclusive production of diapause eggs at the end of the pulse. Diapause egg production enables *E. americana* to resist adverse conditions, ensuring its survival in temperate estuaries.

**Keywords:** egg morphology, *Eurytemora americana*, reproductive strategy.

### Introduction

Egg morphology has been used as an appropriate tool for systematic studies and population dynamics research in copepods (Belmonte and Puce, 1994; Chen and Marcus, 1997; Belmonte, 1998; Castro-Longoria and Williams, 1999). Copepod eggs can differ between species and even within those species that produce resting and subitaneous eggs during their reproductive cycles. Moreover, specific features found in resting eggs may be helpful in determining the distribution of seasonal species (Belmonte and Puce, 1994; Castro-Longoria, 2001; Castellani and Lucas, 2003). Most species of calanoid copepod show morphological differences between subitaneous and diapause eggs (Zillioux and Gonzalez, 1972; Belmonte, 1992, 1998), but often, eggs are not readily distinguishable from each other using conventional microscope techniques (Kasahara *et al.*, 1974; Ianora and Santella, 1991; Onoue *et al.*, 2004; Hansen *et al.*, 2010; Samchyshyna and Santer, 2010). Diapause eggs are produced by some copepods in response to cues preceding

the onset of environmental adversity (Grice and Marcus, 1981; Marcus, 1982; Hairston and Olds, 1984; Ban, 1992; Belmonte and Pati, 2007). This type of resting egg, unlike subitaneous quiescent eggs, stays in an arrested development state and does not hatch, even under favourable conditions, until the refractory phase is complete (Watson and Smallman, 1971; Marcus, 1996; Chen and Marcus, 1997; Castro-Longoria, 2001; Katajisto, 2006). It has been reported that the calanoid copepod *Eurytemora americana* probably produces diapause eggs as resting eggs (Marcus, 1984; Hoffmeyer *et al.*, 2008) like its congener *E. affinis* (Ban, 1992; Ban and Minoda, 1992; Hirche, 1992; Katajisto, 2006), but there are no studies to date on the dormancy strategy of *E. americana*. Although the morphological description of copepod eggs is of ecological importance, data on these features of *E. americana* eggs are still lacking in the literature.

*Eurytemora americana* was introduced into the Bahía Blanca Estuary (BBE) through ballast water in the mid-1980s (Hoffmeyer, 1994; Hoffmeyer *et al.*, 2000). Each year, it develops a brief planktonic pulse in the estuary during the cold austral season from June to October, then disappears from the water column (Hoffmeyer, 2004; Hoffmeyer *et al.*, 2008). The first *E. americana* nauplii are recruited from benthic resting eggs at the start of the cold season, with minimal surface temperatures (6–7.2°C), low daily irradiation (5 MJ m<sup>-2</sup>), and high phytoplankton biomass (Hoffmeyer *et al.*, 2008, 2009). Over approximately the past 20 years, this calanoid copepod has become one of the most abundant species within the mesozooplankton in the BBE, so has been considered a key species in the trophic web of the estuary (Hoffmeyer *et al.*, 2009).

Only two studies have focused on the reproductive biology of *E. americana* and the influence of environmental factors on its fecundity (Berasategui *et al.*, 2009a, b). Those studies revealed that the species has two markedly distinct reproductive patterns in the BBE, depending on the temporal environment. During the period of population growth, from July to early September, it produces large clutches of subitaneous eggs with high hatching success. When environmental conditions become unfavourable from September to October (early spring; temperature > 12°C, Chl *a* < 8 µg l<sup>-1</sup>), however, clutch size (CS) is small and hatching success is poor. The latter is associated with the production of resting eggs to ensure population recruitment in the BBE. Although an increase in egg size at the end of the planktonic pulse has been reported, suggesting them to be resting eggs (Berasategui *et al.*, 2009b), no studies have confirmed this. The aims of the present study were therefore to (i) describe the morphology of the different types of egg produced by *E. americana* and to ascertain whether there are morphological variations between subitaneous and resting eggs, (ii) confirm that the eggs produced by *E. americana* at the end of the population pulse are resting eggs, possibly diapause eggs, and (iii) analyse the relationship between the morphological features observed and environmental variables,

population abundance (PA), females size, and CS to supplement knowledge of the reproductive strategy of *E. americana* in the BBE.

## Methods

The BBE is a temperate, highly turbid, mesotidal system (Perillo *et al.*, 2007) located in the SW Atlantic in Argentina (38°45'–39°40'S 61°45'–62°30'W). The sampling site, Puerto Cuatros (Figure 1), is located in the innermost zone of the estuary. It is a eutrophic area characterized by marked seasonal variation in terms of temperature (mean 5.1°C in winter, 26.4°C in summer) and salinity (17.9 and 41.3, respectively). Hypersalinity is usually registered during hot dry summers when elevated evaporation rates produce high salt concentrations in the adjacent tidal marshes (Freije *et al.*, 2008).

Sampling took place during the 2007 *E. americana* planktonic pulse on nine occasions: 3 and 17 July, 1, 6, and 15 August, 5 and 20 September, and 2 and 8 October. On each sampling date, field females were collected by two replicate oblique tows, using a plankton net with 200 µm mesh. One sample was preserved in 4% formalin to obtain fixed females, and one was kept live and transported in a temperature-controlled 5 l container to maintain field temperature until arrival at the laboratory. *In situ* temperature and salinity were recorded using a HORIBA® multiparameter probe. Surface water was collected to determine Chl *a* according to Lorenzen (1967) and for use in the experimental incubations (10–20 l). The photoperiod was estimated as the number of light hours (h) per sampling day.

Seasonal patterns of prosome length (PL), CS, and PA, measured during the period of the present study, were described by Berasategui *et al.* (2009b) and provide context for the results presented here. The period of *E. americana* population growth, from June to early September, was defined as the period in which the abundance increased until 5 September, when the population peaked. A period of population decline was registered thereafter, until the final disappearance of the copepod from the water column in November.

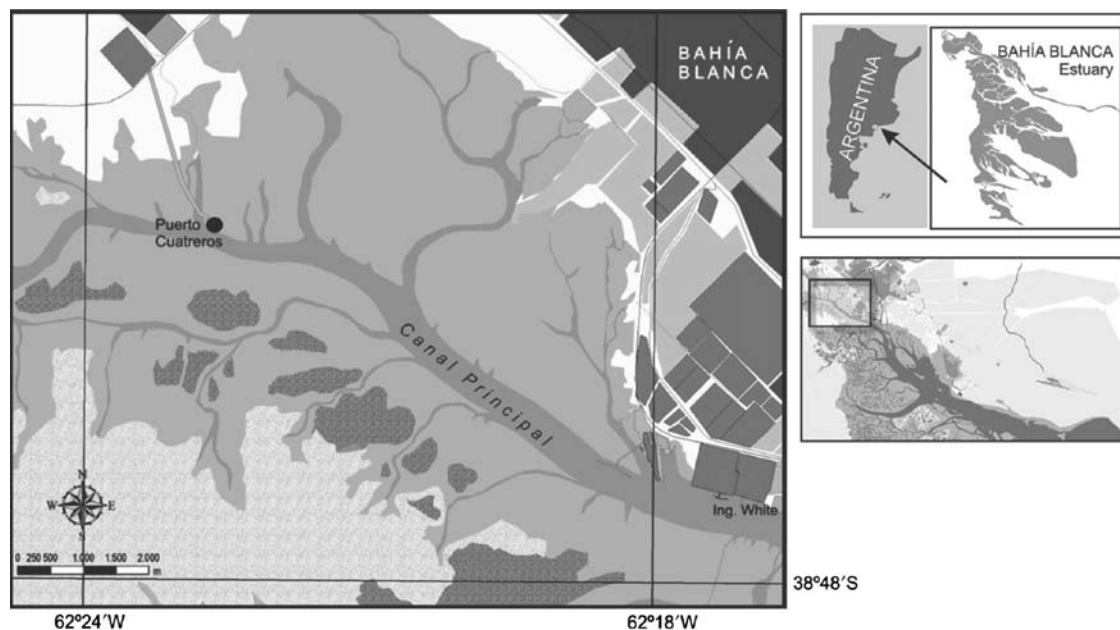

**Figure 1.** Map of the BBE, showing the locations of Bahía Blanca City, the port of Ingeniero White (Ing. White), and the sampling site, Puerto Cuatros.

### Hatching pattern

To evaluate the resting character of the eggs produced by *E. americana* at the end of the population pulse, egg-carrying females were sorted from live mesozooplankton samples and incubated simulating the *in situ* environmental conditions recorded. On each sampling date, 10–30 egg-carrying females (with full sacs and empty oviducts) were placed in plastic bottles filled with 5 l of filtered seawater ( $<60 \mu\text{m}$ ). The experimental incubation period varied from 2 to 7 d, until the eggs/nauplii were released. After this period, incubation water was filtered through sieves of 200 and 30  $\mu\text{m}$  to retain and count the nauplii and the unhatched eggs ( $N^{\circ}\text{UE}$ ). The percentage of unhatched eggs (%UE) was estimated taking into account the total number of eggs produced ( $N^{\circ}\text{TE} = N^{\circ}\text{UE} + \text{nauplii}$ ). Incubations were performed in a culture room under regulated temperature conditions. The salinity and the temperature of the incubated water were measured using a digital multisensor probe. For the high-salinity condition, salinity was adjusted by adding distilled water. Oxygen concentration was recorded using a Hanna® oximeter, regulated by aerator and sealing of the incubation devices. The natural photoperiod was simulated during the incubation period by controlling the light hours in the culture room.

Unhatched eggs were subsequently incubated for 3 months under *in situ* nauplii recruitment conditions according to Hoffmeyer et al. (2009). They were placed in glass dishes filled with 200 ml of filtered seawater ( $\leq 30 \mu\text{m}$ ) at 6–7.2°C and low daily irradiation conditions. Incubation conditions, i.e. temperature, salinity, oxygen concentration, photoperiod, and hatching success, were monitored every 7 d.

### Egg morphology

To examine the morphology of the eggs produced by *E. americana* on each sampling date, 15–30 egg-carrying females with full sacs and empty oviducts were selected from fixed mesozooplankton samples. The eggs of each female were isolated for measurement under an optical microscope (OM), and the average diameter (egg size ES) was obtained on each occasion ( $n = 20\text{--}30$  eggs). To cover the entire population pulse, 227 eggs from the different sampling dates were measured optically. To describe the surface of the eggs under scanning electron microscope (SEM), 30–40 eggs were selected for each population period (growth, maximum, decline, end). These eggs were selected from a set of eggs produced by different females previously isolated for each population period. Observations of the appearance of the eggs on full-sac egg-carrying females (5–10 for each population period) were also made under SEM. The eggs processed by SEM were pre-fixed in vials with 4% formalin for 1 month, as advised by Belmonte and Puce (1994). After pre-fixation, they were prepared following the Sorrivias de Lozano and Morales (1986) and Castro-Longoria (2001) protocols. The eggs were subsequently rinsed in seawater ( $\leq 0.2 \mu\text{m}$ ), then cleaned by ultrasound in 1% hydrochloric acid solution for 3–6 min. Post-fixation was then applied overnight at 18–20°C with formalin acetic acid ethanol, after which the eggs were dehydrated in ethanol series, then dried by a critical point. Finally, they were mounted on stubs and sputter-coated with gold.

To describe and analyse the structure of the eggs under transmission electron microscopy (TEM), 30–40 eggs were selected from egg-carrying females isolated from live mesozooplankton samples of each population period. These eggs were processed

following the protocols of Couch et al. (2001), with modifications taken from Sorrivias de Lozano and Morales (1986). They were pre-fixed in vials with 3% glutaraldehyde at 5°C for 3–5 d. A secondary post-fixation technique was applied using 1% buffered osmium tetroxide cacodylate (0.2 M) for 2.5 h at room temperature (pH 7.4). Thereafter, the eggs were rinsed in distilled water and dehydrated in a series of ethanol dilutions (50, 70 and 95%) for 45 min each. They were then submerged overnight in acetone with a first solution of 50:50 alcohol–acetone, then transferred to 90% acetone for 60 min at room temperature. Infiltration in Spurr's resin (1969) was performed in increasing concentrations (1:1 acetone–resin for 60 min, 1:2 acetone–resin for 60 min, and resin overnight). Polymerization was conducted at 60°C for 48 h. As a contrast, the block-stain method was performed with 3% uranyl acetate and 0.5% lead citrate (pH 11.2). Visualization was performed under a transmission microscope (JEOL-Erlangshen CCD camera model 785ES1000W) with a potential of 80 kV and digital program GATAN.

### Statistical analysis

Non-parametric tests were used because the variables considered did not meet normality and homoscedasticity assumptions. To analyse the differences in ES, PL, and CS among sampling dates (nine campaigns), a Kruskal–Wallis test was applied. ES was also analysed throughout the population pulse using the same test followed by a Tukey–Kramer test to determine the sampling dates on which differences were significant. A Mann–Whitney test was applied to seek statistical differences in ES between the periods of population growth and decline. In addition, to supplement the information on *E. americana* reproductive strategy, relationships among environmental variables, PL, CS, ES, and PA, were analysed using Spearman's rank correlations. PL, CS, and PA data ( $n = 227$ ) were taken from Berasategui et al. (2009b) for reanalysis along with the results of the present study.

## Results

### Field conditions

Low temperatures (5.25–7°C), high salinities (32.73–37.51), and high values of Chl *a* (8.07–20.09  $\mu\text{g l}^{-1}$ ) were observed from July to early September 2007, coinciding with the period of *E. americana* population growth (Figures 2a and 3a). The Chl *a* pattern revealed two maxima during this period (20.09 and 10.32  $\mu\text{g l}^{-1}$ ), the largest magnitude on 17 July, corresponding to the winter phytoplankton bloom. A decrease in Chl *a* (values generally  $< 3.4 \text{ mg l}^{-1}$ ) and an increase in temperature ( $\geq 12^{\circ}\text{C}$ ) and daylight ( $> 12 \text{ h}$ ) were recorded from 15 August on. Salinity remained high (37.51–27.62) during the whole study period, with values  $< 30$  from September on (Figure 3a).

### Hatching pattern

There was an increase in the total number of eggs produced ( $N^{\circ}\text{TE}$ ) in the incubations performed during the period of population growth, but it then decreased, after the population peaked (Figure 2a). A low %UE was found in the incubations with females from the period of population growth, and large numbers of nauplii were counted. In contrast, %UE increased in the experimental incubation with females from the period of population decline (Figure 3b), and unhatched eggs were released in mass form (Figure 4f). This pattern coincided with an increase in temperature to  $\geq 12^{\circ}\text{C}$  and photoperiod, and a decrease in



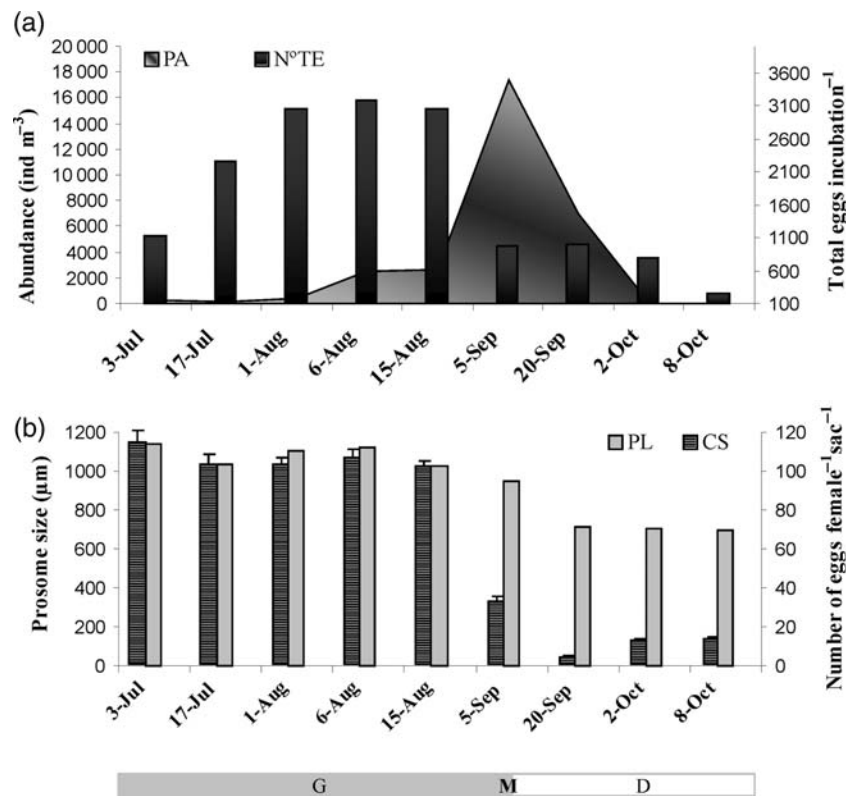

**Figure 2.** Seasonal pattern of the biological variables. Seasonal patterns of (a) PA and total egg production in each incubation (N°TE), and (b) PL and CS. PL, CS, and PA data were taken from [Berasategui et al. \(2009b\)](#) and correspond to the same population pulse under study. G, period of population growth; M, maximum (peak) abundance; D, period of population decline.

salinity and Chl *a* (Figure 3a and b). The unhatched eggs did not hatch, although they had been incubated for 3 months under favourable *in situ* recruitment conditions.

### Egg morphology

During the period of population growth, ES ranged from  $89.86 \pm 0.72 \mu\text{m}$  ( $n = 22$ ) on 17 July to  $96.56 \pm 0.48 \mu\text{m}$  ( $n = 30$ ) on 6 August, and during the period of population decline, from  $96.39 \pm 0.61 \mu\text{m}$  ( $n = 30$ ) on 5 September to  $98.88 \pm 0.45 \mu\text{m}$  ( $n = 30$ ) on 8 October (Figure 3b). No differences were observed (OM) in the morphology of the eggs produced at the start and those produced at the end of the pulse (Figure 4e and f), although SEM results indicated morphological differences in the surface of the chorion between the eggs produced during the two periods (Figure 4a and c vs. Figure 4b and d). Eggs produced during the period of population growth showed a sinuous patterned chorion with concave marks, possibly caused by the effect of the pressure from adjacent eggs inside the sac (Figure 4a and c), whereas the chorion of those produced at the end of the pulse showed a sponge-like appearance (Figure 4b and d). Eggs with a sponge-like appearance and a small proportion ( $\leq 15\%$ ) of sinuous patterned chorion eggs were found within the same sac in egg-carrying females collected after the population had peaked. TEM revealed that the eggs with a sponge-like appearance were surrounded by an egg envelope and that the shell consisted of 4–5 layers  $1.25 \mu\text{m}$  thick (Figure 5a). The eggs with a sinuous appearance consisted of a single shell  $< 0.15 \mu\text{m}$  thick (Figure 5b).

### Egg morphology and relationships between environmental and biological variables

Smaller eggs coincided with larger females and larger CS (101–114 eggs per sac per female) during the period of population growth (Figures 2b and 3b). After peak PA, however, the average ES increased from  $96.39 \pm 0.61$  ( $n = 30$ ) to  $98.88 \pm 0.45 \mu\text{m}$  ( $n = 30$ ), CS decreased from 32 to 4 eggs per sac per female, and PL decreased from  $0.95 \pm 0.02$  to  $0.67 \pm 0.01 \text{ mm}$  ( $n = 30$ ). Medium-sized females, compared with larger females at the start and smaller females at the end of the pulse, were found near the peak period of PA. These females were carrying both eggs of a sponge-like appearance and sinuous patterned chorion eggs. Eggs with a sponge-like appearance were smaller during the population peak than at the end of the pulse (Figure 3b). Very few females typical of the start of the population pulse, i.e. large females with large CS and small ES, were observed during this transitional period.

Highly significant differences were found in ES during the *E. americana* population pulse (Kruskal–Wallis:  $H = 100.26$ ,  $p < 0.001$ ,  $n = 227$ ). The Tukey–Kramer test revealed that the first three sampling dates differed significantly from the last four, whereas the other dates (4 and 5th) were significantly different from the first and last dates, respectively (Table 1). Significant differences in terms of ES were also found when comparing the periods of growth and decline (Mann–Whitney test:  $Z = 8.03$ ,  $p < 0.01$ ,  $n = 122$  and  $n = 105$ , for each period, respectively).

ES showed a significant negative correlation with CS ( $r = -0.47$ ,  $p < 0.01$ , d.f. = 225), PL ( $r = -0.45$ ,  $p < 0.01$ ,

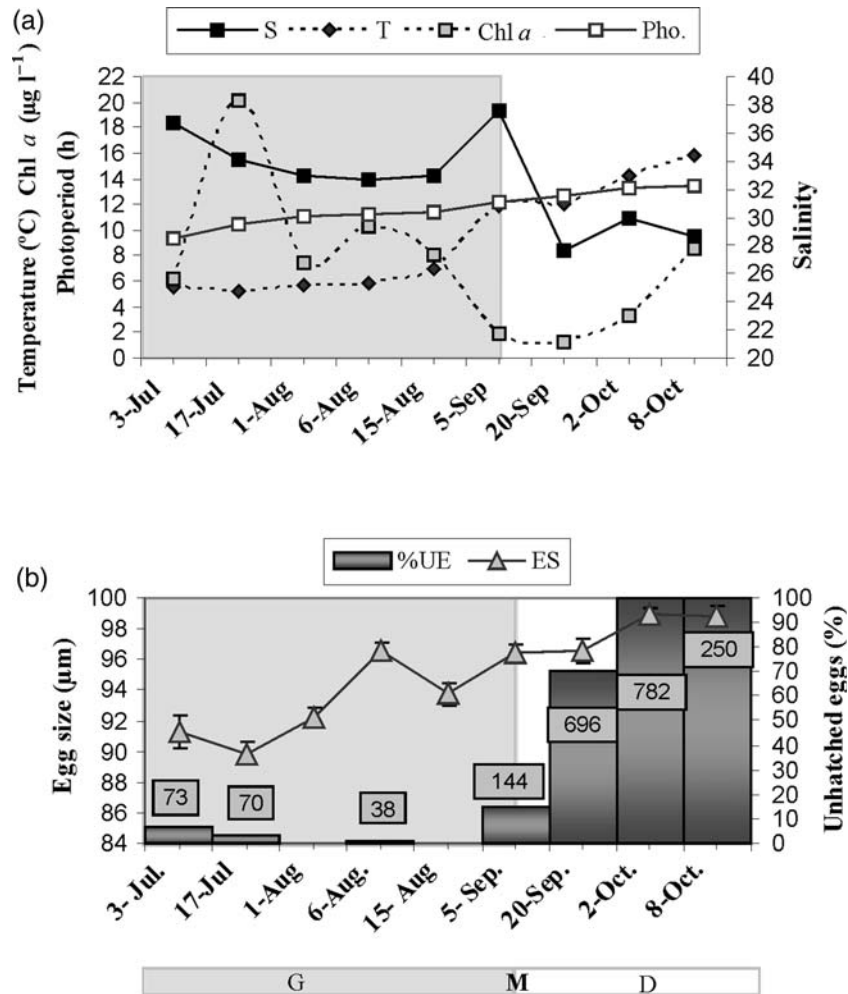

**Figure 3.** Seasonal patterns of (a) *in situ* environmental/experimental variables, and (b) egg size (ES) and the percentage of unhatched eggs (%UE). Unhatched eggs are expressed as the percentage of the total number of eggs (N<sup>TE</sup>). The boxes in each column represent the number of unhatched eggs (N<sup>UE</sup>). G, period of population growth; M, maximum (peak) abundance; D, period of population decline.

d.f. = 225), salinity ( $r = -0.41$ ,  $p < 0.01$ , d.f. = 225), and Chl *a* ( $r = -0.29$ ,  $p < 0.05$ , d.f. = 225), and a significant positive correlation with temperature ( $r = 0.62$ ,  $p < 0.01$ , d.f. = 225) and photoperiod ( $r = 0.62$ ,  $p < 0.01$ , d.f. = 225). The correlation between ES and PA was not significant ( $r = -0.01$ ,  $p \geq 0.05$ , d.f. = 225).

## Discussion

The results of the experimental incubations of field-collected, egg-carrying females suggest that *E. americana* begins to produce resting eggs after the peak PA at temperatures  $\geq 12^\circ\text{C}$  and with increased photoperiod ( $\geq 12$  h), as predicted by Berasategui *et al.* (2009b). Egg hatching decreased in the incubations conducted after PA peaked, when environmental conditions turned unfavourable, suggesting that these unhatched eggs were resting or non-viable eggs. No hatched eggs were found in the incubations conducted with females taken from the end of the pulse, suggesting that *E. americana* produces resting eggs only at the termination of the pulse, agreeing with the findings of Hoffmeyer *et al.* (2008) and with those reported by Ban and Minoda (1991) for the congener *E. affinis*. The possible resting character of these eggs was confirmed in the present study by their typical behaviour of

failing to hatch even under favourable conditions (Watson and Smallman, 1971; Marcus, 1996; Chen and Marcus, 1997; Castro-Longoria, 2001; Katajisto, 2006). The findings here therefore suggest that the resting eggs produced by *E. americana* are diapause eggs that do not hatch, probably because they require a refractory phase before embryo development can continue. Nevertheless, to arrive at a better understanding of diapause eggs as a dormancy strategy, it is necessary to perform more studies on eggs from benthic banks.

The eggs with a sinuous patterned chorion were mainly produced during the period of population growth and classed as subitaneous eggs owing to their high rate of hatching success (Castro-Longoria, 2001; Katajisto, 2006). The low percentage of unhatched eggs during this period could correspond to non-viable subitaneous eggs; some of the unhatched eggs recorded during and after peak PA are also likely to be non-viable subitaneous eggs (Marcus, 1996; Chen and Marcus, 1997). On the other hand, eggs whose chorion had a sponge-like appearance and which appeared after the population peaked were categorized as diapause eggs because they failed to hatch even under favourable conditions (Watson and Smallman, 1971; Katajisto, 2006). The SEM observation of both morphotypes after peak PA confirmed the existence of

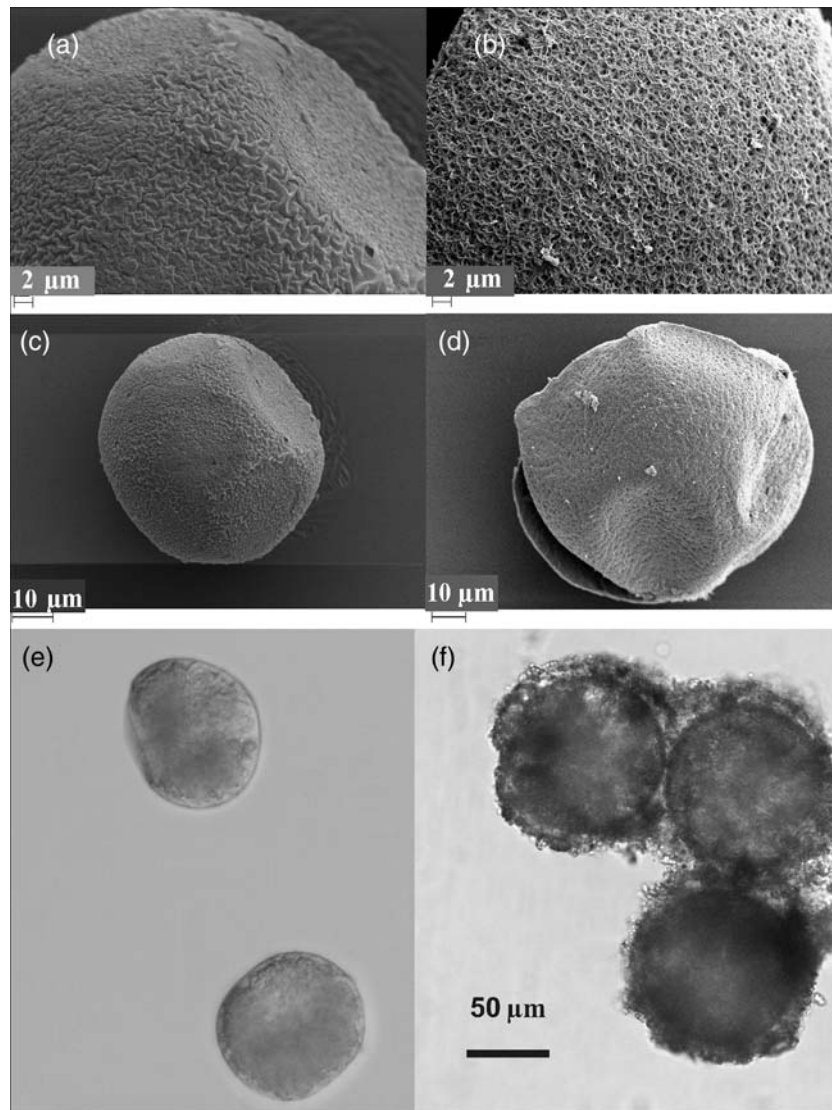

**Figure 4.** Egg morphology by optical and SEM techniques. Appearance of eggs produced (a, c, and e) mainly during the period of peak population growth and (b, d, and f) during the period of population decline. (e and f) Optical images. (a–d) Details of the chorion surface under SEM.

a reproductive transitional stage, previously mentioned by *Berasategui et al.* (2009a), before the exclusive production of diapause eggs (as a dormancy strategy) at the end of the pulse. The findings also agree with the observations of *Ban and Minoda* (1991) for *E. affinis*. Those authors reported that, usually, all *E. affinis* eggs within a single sac could be identified as either subitaneous or diapause, although a few subitaneous eggs were occasionally found in a diapause egg sac during the switch in production from subitaneous to diapause eggs.

The variations observed in the morphology of *E. americana* eggs during the population pulse coincide with those reported in previous studies on other copepods (*Chen and Marcus*, 1997; *Belmonte*, 1998; *Castro-Longoria*, 2001) and depict the reproductive strategy of this species in the estuary. The difference in size between egg samples from the start and the end of the pulse became more pronounced, diapause eggs being larger than subitaneous eggs. *Eurytemora americana*, like many calanoid copepods

(*Ianora and Santella*, 1991; *Cuoc et al.*, 1994), produces subitaneous and diapause eggs that are indistinguishable by OM but whose chorions are shown by electron microscopy to be different. The differences in surface ornamentation between eggs classed as subitaneous and the diapause eggs reported here are in accord with the findings of *Onoue et al.* (2004) and *Hansen et al.* (2010) for other calanoid copepods. The variation in the thickness of the chorion of the two egg types, subitaneous eggs having a thicker shell than diapause eggs, has been reported too by *Ban and Minoda* (1991) for *E. affinis* and by *Castellani and Lucas* (2003) for *Temora longicornis*.

The chorion structure of resting eggs was consistent with the diapause type (*Santella and Ianora*, 1990; *Ianora and Santella*, 1991; *Belmonte and Puce*, 1994; *Belmonte*, 1998; *Cuoc et al.*, 1994; *Couch et al.*, 2001). The thick shell covering diapause eggs allows them to resist stress such as desiccation (*Hairston and Walton*, 1986; *Brendonck*, 1996), toxins (*Naess*, 1991), and

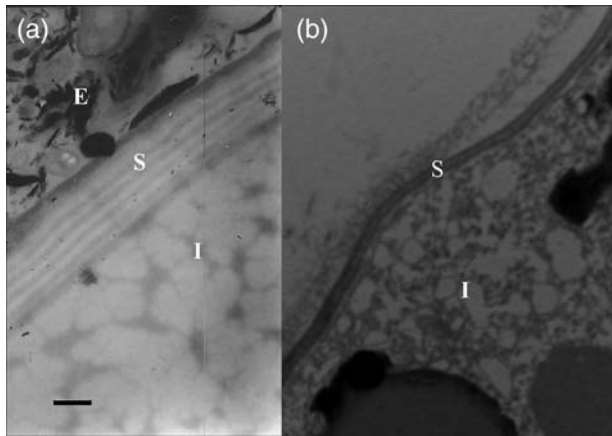

**Figure 5.** Egg morphology by the TEM technique. Appearance of eggs produced during the period of (a) population decline, and (b) population growth. E, outer envelope of egg; S, inner layer of egg shell; I, egg interior. Scale bar = 0.5  $\mu\text{m}$ .

**Table 1.** The Tukey–Kramer multiple comparison test among date groups using egg diameter as the variable analysed, showing significantly different groups ( $p < 0.05$ ).

| Date         | Date group | n  | Mean $\pm$ s.d.  | Different from groups |
|--------------|------------|----|------------------|-----------------------|
| 3 July       | 1          | 10 | 91.29 $\pm$ 3.50 | 6, 4, 7, 9, 8         |
| 17 July      | 2          | 22 | 89.87 $\pm$ 3.37 | 5, 6, 4, 7, 9, 8      |
| 1 August     | 3          | 30 | 92.20 $\pm$ 3.75 | 6, 4, 7, 9, 8         |
| 6 August     | 4          | 30 | 96.56 $\pm$ 2.66 | 2, 1, 3               |
| 15 August    | 5          | 30 | 93.73 $\pm$ 4.21 | 2, 9, 8               |
| 5 September  | 6          | 30 | 96.39 $\pm$ 3.32 | 2, 1, 3               |
| 20 September | 7          | 30 | 96.56 $\pm$ 4.67 | 2, 1, 3               |
| 2 October    | 8          | 30 | 98.88 $\pm$ 2.49 | 2, 1, 3, 5            |
| 8 October    | 9          | 15 | 98.83 $\pm$ 2.64 | 2, 1, 3, 5            |

anoxia (Marcus and Lutz, 1998) during their resting period in the bottom sediments of an estuary. Previous studies in the inner zone of the BBE have suggested the presence of *E. americana* eggs in the bottom sediments of tidal flats (Diodato et al., 2006), which are exposed to environmental changes driven by tidal cycles and the impact of sewage (Marcovecchio et al., 2008). The particular morphology and ultrastructure of diapause eggs enable them to adapt better than quiescent eggs and hence to survive for long periods in the sediment (Hairston and Olds, 1984; Marcus, 1996; Støttrup et al., 1999), providing *E. americana* with a survival advantage over other copepods in a competitive environment. In fact, over the past 20 years, this invasive species has caused temporal exclusion of the historically most common copepod, *Acartia tonsa* from the BBE (Hoffmeyer et al., 2009). Although *A. tonsa* has been reported to produce diapause eggs in other estuaries (Zillioux and Gonzalez, 1972; Grice and Marcus, 1981; Marcus, 1996; Castro-Longoria, 2001), in the BBE, it may produce resting eggs that behave as transitional eggs between quiescent and diapause (AAB, pers. obs.). In this sense, *E. americana* may have a survival advantage over *A. tonsa*, because it produces eggs structurally more resistant to adverse environmental conditions. However, further comparative study is required to test this hypothesis rigorously.

As the history of the female plays a basic role in its fecundity (Stearns et al., 1989; Tiselius et al., 1995; Runge and Roff, 2000),

it is difficult to determine the factors that trigger diapause egg production in studies conducted with field-collected females. However, the present findings suggest that, as for *E. affinis* (Ban, 1992; Ban and Minoda, 1992; Katajisto, 2006), photoperiod and temperature could induce diapause egg production in *E. americana*, but in a different manner. Field female *E. americana* began to produce diapause eggs under late spring conditions, with rising temperature and increasing photoperiod, whereas female *E. affinis* produced diapause eggs exclusively under late autumn conditions, with a shortening photoperiod and lower temperature under laboratory conditions (Ban, 1992; Ban and Minoda, 1992; Katajisto, 2006). On the other hand, as observed in *E. affinis*, overpopulation may also induce diapause egg production (Ban, 1992). High population density may therefore have influenced the switch to diapause egg production in *E. americana*, because diapause eggs appeared after the peak in PA. However, further laboratory experiments under controlled temperature, salinity, photoperiod, food, and density conditions are required to test this hypothesis adequately.

Seasonal variation in terms of body size has been reported in *E. americana* by Hoffmeyer and Torres (2001), linked to temperature and food conditions. Those authors also reported that females became smaller at the end of the phytoplankton bloom, when temperatures began to rise. During the *E. americana* population pulse under study, a gradual increase in ES was accompanied by a decrease in the size of females. Therefore, according to Berasategui et al. (2009b), the smaller females from the end of the pulse could be the result of a metabolic balance in favour of diapause egg production under unfavourable conditions, leaving little reserves to be accumulated in body mass.

The variations observed in the morphology of *E. americana* eggs along the reproductive strategy in the BBE are probably related to a modified dormancy strategy in its reproductive behaviour, triggered by an increase in temperature, photoperiod, and peak PA. Diapause egg production would appear, therefore, to enable *E. americana* to withstand adverse environmental conditions in the bottom sediments, ensuring the survival of the population in future years.

## Acknowledgements

The study is based partly on the PhD thesis of the first author and was supported by grant PICT1713-2006 (ANPCYT) and a CONICET fellowship. We thank the Instituto Argentino de Oceanografía and the staff of the Marine Chemistry Laboratory for their collaboration, and Viviana Sorrivás for providing supplies for the TEM–SEM study. The assistance of the staff of the Electron Microscope Lab (CCT-CONICET-BB) is also much appreciated. Finally, we thank two anonymous reviewers for their valued comments on the manuscript submitted.

## References

- Ban, S. 1992. Effects of photoperiod, temperature and population density on introduction of diapause egg production in *Eurytemora affinis* (Copepoda: Calanoida) in the Lake Ohnuma, Hokkaido, Japan. *Journal of Crustacean Biology*, 12: 361–367.
- Ban, S., and Minoda, T. 1991. The effect of temperature on the development and hatching of diapause and subitaneous eggs in *Eurytemora affinis* (Copepoda: Calanoida) in Lake Ohnuma, Hokkaido, Japan. *Bulletin of the Plankton Society of Japan*, 91: 299–308.



- Ban, S., and Minoda, T. 1992. The hatching of diapause eggs of *Eurytemora affinis* (Copepoda: Calanoida) collected from lake-bottom sediments. *Journal of Crustacean Biology*, 12: 51–56.
- Belmonte, G. 1992. Diapause egg production in *Acartia* (*Paracartia*) *latisetosa* (Crustacea, Copepoda, Calanoida). *Bollettino di Zoologia*, 59: 363–366.
- Belmonte, G. 1998. The egg morphology of 7 Acartiidae species: a preliminary survey of the ootaxonomy of calanoids. *Journal of Marine Systems*, 15: 35–39.
- Belmonte, G., and Pati, A. C. 2007. Hatching rate and diapause duration in eggs of *Paracartia latisetosa* (Copepoda: Calanoida). *Journal of Plankton Research*, 9: 39–47.
- Belmonte, G., and Puce, M. 1994. Morphological aspects of subitaneous and resting eggs from *Acartia josephinae* (Calanoida). *Hydrobiologia*, 293: 131–135.
- Berasategui, A. A., Hoffmeyer, M. S., Biancalana, F., Fernández Severini, M. D., and Menéndez, M. C. 2009b. Temporal variations in abundance and fecundity of the invading copepod *Eurytemora americana* in Bahía Blanca Estuary during an unusual year. *Estuarine Coastal and Shelf Science*, 85: 82–88.
- Berasategui, A. A., Hoffmeyer, M. S., Menéndez, M. C., and Biancalana, F. 2009a. Análisis exploratorio sobre la estrategia reproductiva del copépodo invasor *Eurytemora americana*. In *Ambientes y Recursos Naturales del Sudoeste Bonaerense: Producción, Contaminación y Conservación*, pp. 409–419. Ed. by N. J. Cazzaniga, and H. M. Arelovich. UNS Press, Bahía Blanca. 513 pp.
- Brendonck, L. 1996. Diapause, quiescence, hatching requirements: what we can learn from large, freshwater branchiopods (Crustacea: Branchiopoda: Anostraca, Notostraca, Conchostraca). *Hydrobiologia*, 320: 85–97.
- Castellani, C., and Lucas, I. A. N. 2003. Seasonal variation in egg morphology and hatching success in the calanoid copepods *Temora longicornis*, *Acartia clausi* and *Centropages hamatus*. *Journal of Plankton Research*, 25: 527–537.
- Castro-Longoria, E. 2001. Comparative observations on the external morphology of subitaneous and diapause eggs of *Acartia* species from Southampton Water. *Crustaceana*, 74: 225–236.
- Castro-Longoria, E., and Williams, J. A. 1999. The production of subitaneous and diapause eggs: a reproductive strategy for *Acartia biflosa* (Copepoda: Calanoida) in Southampton Water, UK. *Journal of Plankton Research*, 21: 65–84.
- Chen, F., and Marcus, N. H. 1997. Subitaneous, diapause, and delayed-hatching eggs of planktonic copepods from the northern Gulf of Mexico: morphology and hatching success. *Marine Biology*, 127: 587–597.
- Cuoc, C., Brunet, M., Arnaud, J., and Mazza, J. 1994. Formation of egg envelopes in the freshwater calanoid copepod, *Hemidiaptomus ingens*. *Invertebrate Reproduction and Development*, 26: 63–78.
- Couch, K. M., Downes, M., and Burns, C. 2001. Morphological differences between subitaneous and diapause eggs of *Boeckella triarticulata* (Copepoda: Calanoida). *Freshwater Biology*, 46: 925–933.
- Diodato, S. L., Berasategui, A. A., and Hoffmeyer, M. S. 2006. Morphological types and seasonal variation in eggs of zooplankton species from bottom sediments in Bahía Blanca Estuary, Argentina. *Brazilian Journal of Oceanography*, 54: 161–167.
- Freije, R. H., Spetter, C. V., Marcovecchio, J. E., Popovich, C. A., Botté, S. E., Negrín, V., and Arias, A. 2008. Water chemistry and nutrients in the Bahía Blanca Estuary. In *Perspectives on Integrated Coastal Zone Management in South America*, pp. 243–256. Ed. by R. Neves, J. Baretta, and M. Mateus. IST Press, Scientific Publishers, Lisbon. 604 pp.
- Grice, G. D., and Marcus, N. H. 1981. Dormant eggs of marine copepods. *Oceanography and Marine Biology: an Annual Review*, 19: 125–140.
- Hairston, N. G., and Olds, E. J. 1984. Population differences in the timing of diapause: adaptation in a spatially heterogeneous environment. *Oecologia*, 61: 42–48.
- Hairston, N. G., and Walton, W. E. 1986. Rapid evolution of a life history trait. *Proceedings of the National Academy of Sciences of the USA*, 83: 4831–4833.
- Hansen, B. W., Drillet, G., Kristensen, R. M., Sørensen, T. F., and Tøttrup, M. T. 2010. Production, hatching success and surface ornamentation of eggs of *Calanoid* copepods during a winter at 57°N. *Marine Biology*, 157: 59–68.
- Hirche, H. J. 1992. Egg production of *Eurytemora affinis*. Effect of k-strategy. *Estuarine Coastal and Shelf Science*, 35: 395–407.
- Hoffmeyer, M. S. 1994. Seasonal succession of Copepoda in the Bahía Blanca Estuary. In *Ecology and Morphology of Copepods*, pp. 303–308. Ed. by F. D. Ferrari, and B. P. Bradley. *Hydrobiologia*, 530.
- Hoffmeyer, M. S. 2004. Decadal change in zooplankton seasonal succession in the Bahía Blanca Estuary, Argentina, following introduction of zooplankton species. *Journal of Plankton Research*, 26: 181–189.
- Hoffmeyer, M. S., Berasategui, A. A., Beige, D., and Piccolo, M. C. 2009. Environmental regulation of the estuarine copepods *Acartia tonsa* and *Eurytemora americana* during coexistence period. *Journal of the Marine Biological Association of the UK*, 89: 355–361.
- Hoffmeyer, M. S., Fernández Severini, M. D., Menéndez, M. C., Berasategui, A. A., and Biancalana, F. 2008. Composition and dynamics of mesozooplankton assemblages in the Bahía Blanca Estuary. In *Perspectives on Integrated Coastal Zone Management in South America*, pp. 303–316. Ed. by R. Neves, J. Baretta, and M. Mateus. IST Press, Lisbon. 604 pp.
- Hoffmeyer, M. S., Frost, B. W., and Castro, M. B. 2000. *Eurytemora americana* Williams, 1906, not *Eurytemora affinis* (Poppe, 1880), inhabits the Bahía Blanca Estuary, Argentina. *Scientia Marina*, 64: 111–113.
- Hoffmeyer, M. S., and Torres, E. R. 2001. Morphometric variables and individual volume of *Eurytemora americana* and *Acartia tonsa* females (Copepoda, Calanoida) from the Bahía Blanca Estuary, Argentina. *Hydrobiologia*, 459: 73–82.
- Ianora, A., and Santella, L. 1991. Diapause embryos in the neustonic copepod *Anomalocera patersoni*. *Marine Biology*, 108: 387–394.
- Kasahara, S., Uye, S. I., and Onbé, T. 1974. Calanoid copepod eggs in sea bottom muds. *Marine Biology*, 26: 167–171.
- Katajisto, T. 2006. Benthic resting eggs in the life cycles of calanoid copepods in the northern Baltic Sea. University of Helsinki, Walter and Andree de Nottbeck Foundation Scientific Reports, 29. 46 pp.
- Lorenzen, C. L. 1967. Determination of chlorophyll and phaeopigment. Spectrophotometric equations. *Limnology and Oceanography*, 12: 343–346.
- Marcovecchio, J. E., Botté, S. E., Delucchi, F., Arias, A. H., Fernández Severini, M., De Marco, S., and Tombesi, N. 2008. Pollution processes in Bahía Blanca Estuary environment. In *Perspectives on Integrated Coastal Zone Management in South America*, pp. 301–314. Ed. by R. Neves, J. Baretta, and M. Mateus. IST Press, Lisbon. 604 pp.
- Marcus, N. H. 1982. Photoperiodic and temperature regulation of diapause in *Labidocera aestiva* (Copepoda: Calanoida). *Biological Bulletin*, 162: 45–52.
- Marcus, N. H. 1984. Recruitment of copepod nauplii into the plankton: importance of diapause eggs and benthic processes. *Marine Ecology Progress Series*, 15: 47–54.
- Marcus, N. H. 1996. Ecological and evolutionary significance of resting eggs in marine copepods. *Hydrobiologia*, 320: 141–152.
- Marcus, N. H., and Lutz, R. V. 1998. Longevity of subitaneous and diapause eggs of *Centropages hamatus* (Copepoda: Calanoida) from the northern Gulf of Mexico. *Marine Biology*, 131: 249–257.
- Naess, T. 1991. Tolerance of marine calanoid resting eggs: effects of freezing, desiccation and rotenone exposure a field and laboratory study. *Marine Biology*, 111: 455–459.



- Onoue, Y., Toda, T., and Ban, S. 2004. Morphological features and hatching patterns of eggs in *Acartia steueri* (Crustacea, Copepoda) from Sagami Bay, Japan. *Hydrobiología*, 511: 17–24.
- Perillo, G. M. E., Piccolo, M. C., Palma, E. D., Perez, D. E., and Pierini, O. J. 2007. Oceanografía física. In *Ecosistema del Estuario de Bahía Blanca*, 3rd edn, pp. 61–67. Ed. by M. C. Piccolo, and M. S. Hoffmeyer. Editorial de la Universidad Nacional del Sur, Bahía Blanca, Argentina. 233 pp.
- Runge, J. A., and Roff, J. C., 2000. The measurement of growth and reproductive rates. In *Zooplankton Methodology Manual*, pp. 407–419. Ed. by R. P. Harris, P. H. Wiebe, J. Lenz, H. R. Skjoldal, and M. Huntley. Academic Press, London. 684 pp.
- Samchyshyna, L., and Santer, B. 2010. Chorion structure of diapause and subitaneous eggs of four *Diatomid* copepods (Calanoida, Diaptomidae): SEM observations. *Vestnik Zoologii*, 44: 26–32.
- Santella, L., and Ianora, A. 1990. Subitaneous and diapause eggs in Mediterranean populations of *Pontella mediterranea* (Copepoda: Calanoida): a morphological study. *Marine Biology*, 105: 83–90.
- Sorrivas de Lozano, V., and Morales, A. (Eds). 1986. *Introducción a la Microscopía Electrónica*. Centro Regional de Investigaciones Básicas y Aplicadas de Bahía Blanca Press (CRIBABB). 220 pp.
- Spurr, A. R. 1969. A low-viscosity epoxy resin embedding medium for electron microscopy. *Journal of Ultrastructure Research*, 26: 31–43.
- Stearns, D. E., Tester, P. A., and Walker, R. L. 1989. Diel changes in the egg production rate of *Acartia tonsa* and related environmental factors in two estuaries. *Marine Ecology Progress Series*, 52: 7–16.
- Støttrup, J. G., Bell, J. G., and Sargent, J. R. 1999. The fate of lipids during development and cold storage of eggs in the laboratory-reared calanoid copepod, *Acartia tonsa* Dana, and in response to different algal diets. *Aquaculture*, 176: 257–269.
- Tiselius, P., Hansen, B., and Saiz, E. 1995. Can we use laboratory-reared copepods for experiments? A comparison of feeding behaviour and reproduction between field and a laboratory population of *Acartia tonsa*. *ICES Journal of Marine Science*, 52: 369–376.
- Watson, N. H. F., and Smallman, B. N. 1971. The role of photoperiod and temperature in the induction and termination of an arrested development in two species of freshwater cyclopoid copepods. *Canadian Journal of Zoology*, 49: 855–862.
- Zillioux, E. J., and Gonzalez, J. G. 1972. Egg dormancy in a neritic calanoid copepod and its implications to overwintering in boreal waters. In *Proceedings of the Fifth European Marine Biology Symposium*, pp. 217–230. Ed. by B. Battaglia. Piccin Editore, Padova, Italy.
